# Supplementary material
Source: MDPI journal article supplement (https://www.mdpi.com/2073-4352/2/1/90)
Supplement: s1 [file s1]

data_CM016

_publ_contact_author_name        'K\"ockerling, Martin'

# contact author for X-ray structure 

_publ_contact_author_address     
;
Universit\"at Rostock
Institut f\"ur Chemie
Anorganische Festk\"orperchemie
Albert-Einstein-Str. 3a
D-18059 Rostock
Germany
;

_publ_contact_author_email       'Martin.Koeckerling@uni-rostock.de'
_publ_contact_author_phone       '++49 381 6390'
_publ_contact_author_fax         '++49 381 6382'

loop_
_publ_author_name
_publ_author_address

'Mamat, Constantin'
;
Helholtz-Zentrum Dresden-Rossendorf
Institut f\"ur Radiopharmazie
Bautzner Landstr. 400
D-01328 Dresden
Germany
;

'Flemming, Anke'
;
Universit\"at Rostock
Institut f\"ur Chemie
Anorganische Festk\"orperchemie
Albert-Einstein-Str. 3a
D-18059 Rostock
Germany
;

'K\"ockerling, Martin'
;
Universit\"at Rostock
Institut f\"ur Chemie
Anorganische Festk\"orperchemie
Albert-Einstein-Str. 3a
D-18059 Rostock
Germany
;

_audit_creation_method             'ct.exe (M. K\"ockerling, 1996)'

_chemical_name_systematic
;
tert-Butyl 4-(2-tert-butoxy-2-oxoethyl)piperizine-1-carboxylate
;

_chemical_melting_point           375 
_chemical_formula_moiety     'C15 H28 N2 O4'     
_chemical_formula_sum        'C15 H28 N2 O4' 
_chemical_formula_weight          300.39 
 
loop_ 
 _atom_type_symbol 
 _atom_type_description 
 _atom_type_scat_dispersion_real 
 _atom_type_scat_dispersion_imag 
 _atom_type_scat_source 
 'C'  'C'   0.0033   0.0016 
 'International Tables Vol C Tables 4.2.6.8 and 6.1.1.4' 
 'H'  'H'   0.0000   0.0000 
 'International Tables Vol C Tables 4.2.6.8 and 6.1.1.4' 
 'N'  'N'   0.0061   0.0033 
 'International Tables Vol C Tables 4.2.6.8 and 6.1.1.4' 
 'O'  'O'   0.0106   0.0060 
 'International Tables Vol C Tables 4.2.6.8 and 6.1.1.4' 
 
_symmetry_cell_setting            monoclinic 
_symmetry_space_group_name_H-M    'P 21/c'
 
loop_ 
 _symmetry_equiv_pos_as_xyz 
 'x, y, z' 
 '-x, y+1/2, -z+1/2' 
 '-x, -y, -z' 
 'x, -y-1/2, z-1/2' 
 
_cell_length_a                    8.4007(2) 
_cell_length_b                    16.4716(4) 
_cell_length_c                    12.4876(3) 
_cell_angle_alpha                 90.00 
_cell_angle_beta                  90.948(1) 
_cell_angle_gamma                 90.00 
_cell_volume                      1727.71(7) 
_cell_formula_units_Z             4 
_cell_measurement_temperature     173(2) 
_cell_measurement_reflns_used     9141
_cell_measurement_theta_min       2.43
_cell_measurement_theta_max       34.34
 
_exptl_crystal_description        'irregular block'
_exptl_crystal_colour             colourless
_exptl_crystal_size_max           0.63 
_exptl_crystal_size_mid           0.42 
_exptl_crystal_size_min           0.39 
_exptl_crystal_density_diffrn     1.155 
_exptl_crystal_density_method     'not measured' 
_exptl_crystal_F_000              656 
_exptl_absorpt_coefficient_mu     0.083 
_exptl_absorpt_correction_type    multi-scan
_exptl_absorpt_correction_T_min   0.9495 
_exptl_absorpt_correction_T_max   0.9683 
_exptl_absorpt_process_details    'Bruker-Nonius SADABS'
 
_diffrn_ambient_temperature       173(2) 
_diffrn_radiation_wavelength      0.71073 
_diffrn_radiation_type            MoK\a 
_diffrn_radiation_source          'fine-focus sealed tube' 
_diffrn_radiation_monochromator   graphite 
_diffrn_measurement_device_type   'CCD area detector'
_diffrn_measurement_method        'phi and omega scans'
_diffrn_reflns_number             52521 
_diffrn_reflns_av_R_equivalents   0.0244 
_diffrn_reflns_av_sigmaI/netI     0.0164 
_diffrn_reflns_limit_h_min        -13 
_diffrn_reflns_limit_h_max        13 
_diffrn_reflns_limit_k_min        -25 
_diffrn_reflns_limit_k_max        25 
_diffrn_reflns_limit_l_min        -19 
_diffrn_reflns_limit_l_max        19 
_diffrn_reflns_theta_min          2.42 
_diffrn_reflns_theta_max          34.38 
_reflns_number_total              7089 
_reflns_number_gt                 5512 
_reflns_threshold_expression      >2sigma(I) 
 
_computing_data_collection        'Bruker SMART'
_computing_cell_refinement        'Bruker SMART'
_computing_data_reduction         'Bruker SAINT'
_computing_structure_solution     'SHELXS-97 (Sheldrick, 1990)'
_computing_structure_refinement   'SHELXL-97 (Sheldrick, 1997)'
_computing_molecular_graphics     'Bruker SHELXTL'

_refine_special_details 
; 
 Refinement of F^2^ against ALL reflections.  The weighted R-factor wR and 
 goodness of fit S are based on F^2^, conventional R-factors R are based 
 on F, with F set to zero for negative F^2^. The threshold expression of 
 F^2^ > 2sigma(F^2^) is used only for calculating R-factors(gt) etc. and is 
 not relevant to the choice of reflections for refinement.  R-factors based 
 on F^2^ are statistically about twice as large as those based on F, and R- 
 factors based on ALL data will be even larger. 
; 
 
_refine_ls_structure_factor_coef  Fsqd  
_refine_ls_matrix_type            full 
_refine_ls_weighting_scheme       calc  
_refine_ls_weighting_details 
 'calc w=1/[\s^2^(Fo^2^)+(0.1022P)^2^+0.7114P] where P=(Fo^2^+2Fc^2^)/3' 
_atom_sites_solution_primary      direct 
_atom_sites_solution_secondary    difmap 
_atom_sites_solution_hydrogens    geom 
_refine_ls_hydrogen_treatment     constr
_refine_ls_extinction_method      none 
_refine_ls_number_reflns          7089 
_refine_ls_number_parameters      190 
_refine_ls_number_restraints      0 
_refine_ls_R_factor_all           0.0801 
_refine_ls_R_factor_gt            0.0629 
_refine_ls_wR_factor_ref          0.1969 
_refine_ls_wR_factor_gt           0.1791 
_refine_ls_goodness_of_fit_ref    1.038 
_refine_ls_restrained_S_all       1.038 
_refine_ls_shift/su_max           0.001 
_refine_ls_shift/su_mean          0.000 

_diffrn_measured_fraction_theta_max    0.976 
_diffrn_reflns_theta_full              34.38 
_diffrn_measured_fraction_theta_full   0.976 
_refine_diff_density_max    0.971 
_refine_diff_density_min   -0.522 
_refine_diff_density_rms    0.064 
 
loop_ 
 _atom_site_label 
 _atom_site_type_symbol 
 _atom_site_fract_x 
 _atom_site_fract_y 
 _atom_site_fract_z 
 _atom_site_U_iso_or_equiv 
 _atom_site_adp_type 
 _atom_site_occupancy 
 _atom_site_symmetry_multiplicity 
 _atom_site_calc_flag 
 _atom_site_refinement_flags 
 _atom_site_disorder_assembly 
 _atom_site_disorder_group 
N1 N 1.02671(12) -0.05986(7) 0.19940(9) 0.0305(2) Uani 1 1 d . . . 
C1 C 1.01733(15) -0.12272(8) 0.11725(11) 0.0339(3) Uani 1 1 d . . . 
H1A H 0.9133 -0.1192 0.0791 0.041 Uiso 1 1 calc R . . 
H1B H 1.0250 -0.1769 0.1514 0.041 Uiso 1 1 calc R . . 
C2 C 1.15094(14) -0.11283(8) 0.03775(10) 0.0280(2) Uani 1 1 d . . . 
H2A H 1.1489 -0.1587 -0.0134 0.034 Uiso 1 1 calc R . . 
H2B H 1.1351 -0.0620 -0.0033 0.034 Uiso 1 1 calc R . . 
N2 N 1.30529(11) -0.11041(6) 0.09364(7) 0.02338(18) Uani 1 1 d . . . 
C3 C 1.30949(13) -0.04158(8) 0.16769(10) 0.0278(2) Uani 1 1 d . . . 
H3A H 1.2899 0.0095 0.1277 0.033 Uiso 1 1 calc R . . 
H3B H 1.4159 -0.0380 0.2026 0.033 Uiso 1 1 calc R . . 
C4 C 1.18329(15) -0.05234(10) 0.25202(10) 0.0329(3) Uani 1 1 d . . . 
H4A H 1.2063 -0.1016 0.2949 0.040 Uiso 1 1 calc R . . 
H4B H 1.1840 -0.0050 0.3009 0.040 Uiso 1 1 calc R . . 
C5 C 0.89242(13) -0.02310(7) 0.23412(9) 0.0236(2) Uani 1 1 d . . . 
O1 O 0.92489(10) 0.02335(6) 0.32065(7) 0.02787(18) Uani 1 1 d . . . 
O2 O 0.76147(10) -0.03113(6) 0.19168(8) 0.0330(2) Uani 1 1 d . . . 
C6 C 0.80597(13) 0.07866(7) 0.36567(9) 0.0261(2) Uani 1 1 d . . . 
C7 C 0.90163(16) 0.12163(9) 0.45318(11) 0.0337(3) Uani 1 1 d . . . 
H7A H 0.9878 0.1528 0.4209 0.051 Uiso 1 1 calc R . . 
H7B H 0.9469 0.0813 0.5027 0.051 Uiso 1 1 calc R . . 
H7C H 0.8318 0.1584 0.4924 0.051 Uiso 1 1 calc R . . 
C8 C 0.7510(2) 0.13936(11) 0.28209(14) 0.0502(4) Uani 1 1 d . . . 
H8A H 0.6894 0.1113 0.2260 0.075 Uiso 1 1 calc R . . 
H8B H 0.8439 0.1655 0.2504 0.075 Uiso 1 1 calc R . . 
H8C H 0.6842 0.1806 0.3157 0.075 Uiso 1 1 calc R . . 
C9 C 0.6707(2) 0.03060(13) 0.41422(16) 0.0544(5) Uani 1 1 d . . . 
H9A H 0.6101 0.0031 0.3571 0.082 Uiso 1 1 calc R . . 
H9B H 0.6003 0.0675 0.4527 0.082 Uiso 1 1 calc R . . 
H9C H 0.7144 -0.0099 0.4641 0.082 Uiso 1 1 calc R . . 
C10 C 1.43584(13) -0.10612(7) 0.01905(9) 0.0239(2) Uani 1 1 d . . . 
H10A H 1.5299 -0.0824 0.0562 0.029 Uiso 1 1 calc R . . 
H10B H 1.4055 -0.0693 -0.0405 0.029 Uiso 1 1 calc R . . 
C11 C 1.48149(13) -0.18790(7) -0.02700(9) 0.0243(2) Uani 1 1 d . . . 
O3 O 1.58426(11) -0.17561(5) -0.10558(7) 0.02950(19) Uani 1 1 d . . . 
O4 O 1.43855(17) -0.25282(6) 0.00527(11) 0.0532(4) Uani 1 1 d . . . 
C12 C 1.66642(15) -0.24297(8) -0.15977(11) 0.0317(3) Uani 1 1 d . . . 
C13 C 1.5498(2) -0.30421(12) -0.20725(16) 0.0524(5) Uani 1 1 d . . . 
H13A H 1.4981 -0.3338 -0.1493 0.079 Uiso 1 1 calc R . . 
H13B H 1.6072 -0.3426 -0.2525 0.079 Uiso 1 1 calc R . . 
H13C H 1.4691 -0.2757 -0.2505 0.079 Uiso 1 1 calc R . . 
C14 C 1.7807(2) -0.28181(13) -0.08289(16) 0.0547(5) Uani 1 1 d . . . 
H14A H 1.7217 -0.3088 -0.0260 0.082 Uiso 1 1 calc R . . 
H14B H 1.8505 -0.2402 -0.0514 0.082 Uiso 1 1 calc R . . 
H14C H 1.8451 -0.3219 -0.1207 0.082 Uiso 1 1 calc R . . 
C15 C 1.7464(3) -0.19880(14) -0.2519(2) 0.0732(7) Uani 1 1 d . . . 
H15A H 1.8218 -0.1587 -0.2229 0.110 Uiso 1 1 calc R . . 
H15B H 1.6653 -0.1712 -0.2959 0.110 Uiso 1 1 calc R . . 
H15C H 1.8035 -0.2381 -0.2959 0.110 Uiso 1 1 calc R . . 
 
loop_ 
 _atom_site_aniso_label 
 _atom_site_aniso_U_11 
 _atom_site_aniso_U_22 
 _atom_site_aniso_U_33 
 _atom_site_aniso_U_23 
 _atom_site_aniso_U_13 
 _atom_site_aniso_U_12 
N1 0.0239(4) 0.0382(6) 0.0295(5) -0.0139(4) 0.0057(3) 0.0017(4) 
C1 0.0294(5) 0.0335(6) 0.0393(6) -0.0161(5) 0.0128(5) -0.0070(4) 
C2 0.0267(5) 0.0316(6) 0.0259(5) -0.0101(4) 0.0059(4) -0.0034(4) 
N2 0.0241(4) 0.0239(4) 0.0224(4) -0.0039(3) 0.0072(3) 0.0008(3) 
C3 0.0240(4) 0.0312(5) 0.0283(5) -0.0106(4) 0.0017(4) 0.0022(4) 
C4 0.0269(5) 0.0481(7) 0.0240(5) -0.0101(5) 0.0025(4) 0.0082(5) 
C5 0.0245(4) 0.0246(5) 0.0220(4) -0.0018(4) 0.0062(3) -0.0006(3) 
O1 0.0253(4) 0.0340(4) 0.0243(4) -0.0081(3) 0.0010(3) 0.0085(3) 
O2 0.0239(4) 0.0393(5) 0.0359(5) -0.0110(4) 0.0037(3) -0.0032(3) 
C6 0.0231(4) 0.0294(5) 0.0258(5) -0.0062(4) 0.0029(4) 0.0059(4) 
C7 0.0328(6) 0.0393(7) 0.0290(5) -0.0110(5) 0.0000(4) 0.0048(5) 
C8 0.0683(11) 0.0438(8) 0.0378(7) -0.0048(6) -0.0148(7) 0.0280(8) 
C9 0.0441(8) 0.0648(11) 0.0551(10) -0.0242(8) 0.0259(7) -0.0192(8) 
C10 0.0259(4) 0.0200(4) 0.0262(5) -0.0030(3) 0.0088(4) -0.0009(3) 
C11 0.0256(4) 0.0211(5) 0.0265(5) -0.0019(4) 0.0075(4) 0.0003(3) 
O3 0.0335(4) 0.0226(4) 0.0329(4) -0.0033(3) 0.0159(3) 0.0015(3) 
O4 0.0694(8) 0.0226(5) 0.0690(8) -0.0008(5) 0.0415(7) -0.0035(5) 
C12 0.0317(5) 0.0297(6) 0.0341(6) -0.0080(4) 0.0088(4) 0.0069(4) 
C13 0.0486(8) 0.0527(10) 0.0552(10) -0.0301(8) -0.0181(7) 0.0207(7) 
C14 0.0474(8) 0.0601(11) 0.0560(10) -0.0209(8) -0.0188(7) 0.0269(8) 
C15 0.0902(17) 0.0590(12) 0.0722(13) 0.0026(10) 0.0562(13) 0.0184(11) 
 
_geom_special_details 
; 
 All esds (except the esd in the dihedral angle between two l.s. planes) 
 are estimated using the full covariance matrix.  The cell esds are taken 
 into account individually in the estimation of esds in distances, angles 
 and torsion angles; correlations between esds in cell parameters are only 
 used when they are defined by crystal symmetry.  An approximate (isotropic) 
 treatment of cell esds is used for estimating esds involving l.s. planes. 
; 
 
loop_ 
 _geom_bond_atom_site_label_1 
 _geom_bond_atom_site_label_2 
 _geom_bond_distance 
 _geom_bond_site_symmetry_2 
N1 C5 1.3578(14) .   
N1 C1 1.4587(16) .   
N1 C4 1.4659(17) .   
C1 C2 1.5195(16) .   
C1 H1A 0.9900 .   
C1 H1B 0.9900 .   
C2 N2 1.4629(16) .   
C2 H2A 0.9900 .   
C2 H2B 0.9900 .   
N2 C10 1.4523(13) .   
N2 C3 1.4631(15) .   
C3 C4 1.5171(17) .   
C3 H3A 0.9900 .   
C3 H3B 0.9900 .   
C4 H4A 0.9900 .   
C4 H4B 0.9900 .   
C5 O2 1.2203(14) .   
C5 O1 1.3482(14) .   
O1 C6 1.4706(13) .   
C6 C8 1.512(2) .   
C6 C9 1.519(2) .   
C6 C7 1.5205(17) .   
C7 H7A 0.9800 .   
C7 H7B 0.9800 .   
C7 H7C 0.9800 .   
C8 H8A 0.9800 .   
C8 H8B 0.9800 .   
C8 H8C 0.9800 .   
C9 H9A 0.9800 .   
C9 H9B 0.9800 .   
C9 H9C 0.9800 .   
C10 C11 1.5164(15) .   
C10 H10A 0.9900 .   
C10 H10B 0.9900 .   
C11 O4 1.2003(15) .   
C11 O3 1.3330(13) .   
O3 C12 1.4768(14) .   
C12 C14 1.491(2) .   
C12 C13 1.519(2) .   
C12 C15 1.526(2) .   
C13 H13A 0.9800 .   
C13 H13B 0.9800 .   
C13 H13C 0.9800 .   
C14 H14A 0.9800 .   
C14 H14B 0.9800 .   
C14 H14C 0.9800 .   
C15 H15A 0.9800 .   
C15 H15B 0.9800 .   
C15 H15C 0.9800 .   
 
loop_ 
 _geom_angle_atom_site_label_1 
 _geom_angle_atom_site_label_2 
 _geom_angle_atom_site_label_3 
 _geom_angle 
 _geom_angle_site_symmetry_1 
 _geom_angle_site_symmetry_3 
C5 N1 C1 120.37(10) . .   
C5 N1 C4 124.28(10) . .   
C1 N1 C4 114.39(10) . .   
N1 C1 C2 110.58(10) . .   
N1 C1 H1A 109.5 . .   
C2 C1 H1A 109.5 . .   
N1 C1 H1B 109.5 . .   
C2 C1 H1B 109.5 . .   
H1A C1 H1B 108.1 . .   
N2 C2 C1 110.47(10) . .   
N2 C2 H2A 109.6 . .   
C1 C2 H2A 109.6 . .   
N2 C2 H2B 109.6 . .   
C1 C2 H2B 109.6 . .   
H2A C2 H2B 108.1 . .   
C10 N2 C3 110.92(9) . .   
C10 N2 C2 111.60(9) . .   
C3 N2 C2 109.54(9) . .   
N2 C3 C4 109.78(10) . .   
N2 C3 H3A 109.7 . .   
C4 C3 H3A 109.7 . .   
N2 C3 H3B 109.7 . .   
C4 C3 H3B 109.7 . .   
H3A C3 H3B 108.2 . .   
N1 C4 C3 109.32(10) . .   
N1 C4 H4A 109.8 . .   
C3 C4 H4A 109.8 . .   
N1 C4 H4B 109.8 . .   
C3 C4 H4B 109.8 . .   
H4A C4 H4B 108.3 . .   
O2 C5 O1 125.35(10) . .   
O2 C5 N1 124.11(11) . .   
O1 C5 N1 110.54(10) . .   
C5 O1 C6 121.89(9) . .   
O1 C6 C8 110.32(10) . .   
O1 C6 C9 110.31(12) . .   
C8 C6 C9 113.47(15) . .   
O1 C6 C7 102.06(9) . .   
C8 C6 C7 109.88(12) . .   
C9 C6 C7 110.22(11) . .   
C6 C7 H7A 109.5 . .   
C6 C7 H7B 109.5 . .   
H7A C7 H7B 109.5 . .   
C6 C7 H7C 109.5 . .   
H7A C7 H7C 109.5 . .   
H7B C7 H7C 109.5 . .   
C6 C8 H8A 109.5 . .   
C6 C8 H8B 109.5 . .   
H8A C8 H8B 109.5 . .   
C6 C8 H8C 109.5 . .   
H8A C8 H8C 109.5 . .   
H8B C8 H8C 109.5 . .   
C6 C9 H9A 109.5 . .   
C6 C9 H9B 109.5 . .   
H9A C9 H9B 109.5 . .   
C6 C9 H9C 109.5 . .   
H9A C9 H9C 109.5 . .   
H9B C9 H9C 109.5 . .   
N2 C10 C11 113.48(9) . .   
N2 C10 H10A 108.9 . .   
C11 C10 H10A 108.9 . .   
N2 C10 H10B 108.9 . .   
C11 C10 H10B 108.9 . .   
H10A C10 H10B 107.7 . .   
O4 C11 O3 125.75(11) . .   
O4 C11 C10 125.78(10) . .   
O3 C11 C10 108.37(9) . .   
C11 O3 C12 122.44(9) . .   
O3 C12 C14 109.16(11) . .   
O3 C12 C13 111.99(11) . .   
C14 C12 C13 111.75(14) . .   
O3 C12 C15 101.66(12) . .   
C14 C12 C15 113.76(17) . .   
C13 C12 C15 108.14(17) . .   
C12 C13 H13A 109.5 . .   
C12 C13 H13B 109.5 . .   
H13A C13 H13B 109.5 . .   
C12 C13 H13C 109.5 . .   
H13A C13 H13C 109.5 . .   
H13B C13 H13C 109.5 . .   
C12 C14 H14A 109.5 . .   
C12 C14 H14B 109.5 . .   
H14A C14 H14B 109.5 . .   
C12 C14 H14C 109.5 . .   
H14A C14 H14C 109.5 . .   
H14B C14 H14C 109.5 . .   
C12 C15 H15A 109.5 . .   
C12 C15 H15B 109.5 . .   
H15A C15 H15B 109.5 . .   
C12 C15 H15C 109.5 . .   
H15A C15 H15C 109.5 . .   
H15B C15 H15C 109.5 . .   
 
# eof
